# Supplementary material
Source: MDPI journal article supplement (https://www.mdpi.com/2073-4344/9/5/409)
Supplement: s1 [file s1]

# $\text{H}_3\text{PW}_{12}\text{O}_{40}/\text{SBA-15}$ for the solventless synthesis of 3-substituted indoles

Reza Tayebee<sup>1\*</sup>, Adam F. Lee<sup>2\*</sup>, Lucia Frattini<sup>3</sup> and Shahrebano Rostami<sup>1</sup>

<sup>1</sup>*Department of Chemistry, School of Sciences, Hakim Sabzevari University, Sabzevar, Iran*

<sup>2</sup>*Applied Chemistry and Environmental Science, RMIT University, Melbourne VIC3000, Australia*

<sup>3</sup>*European Bioenergy Research Institute, Aston University, Aston Triangle, United Kingdom*

*\*Corresponding Authors: rtayebee@hsu.ac.ir; adam.lee2@rmit.edu.au*

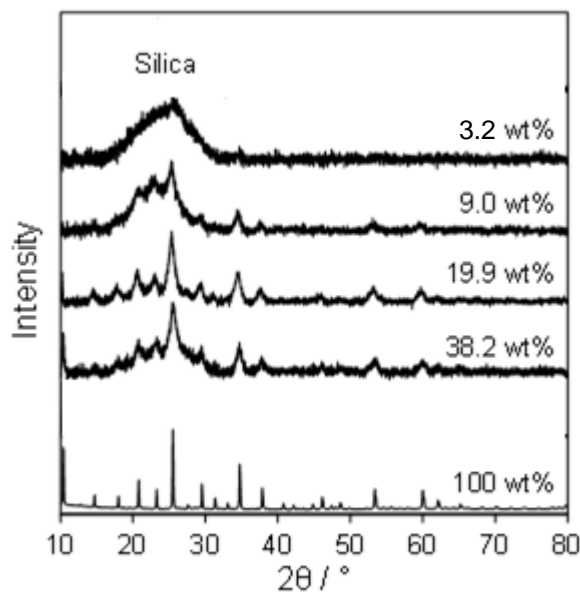

**Figure S1.** Powder XRD patterns for HPW/SBA-15 as a function of W loading, together with a pure HPW reference.

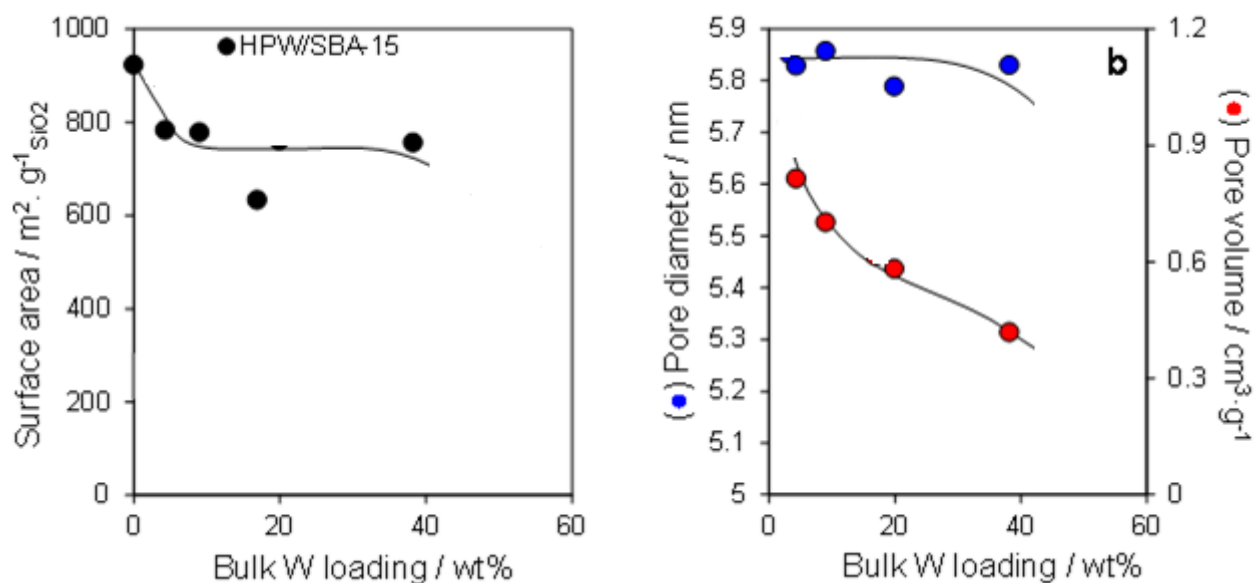

**Figure S2.** Variation of (a) surface areas of HPW/SBA-15 and (b) mesopore diameter and mesopore volume of HPW/SBA-15 as a function of bulk W loading.

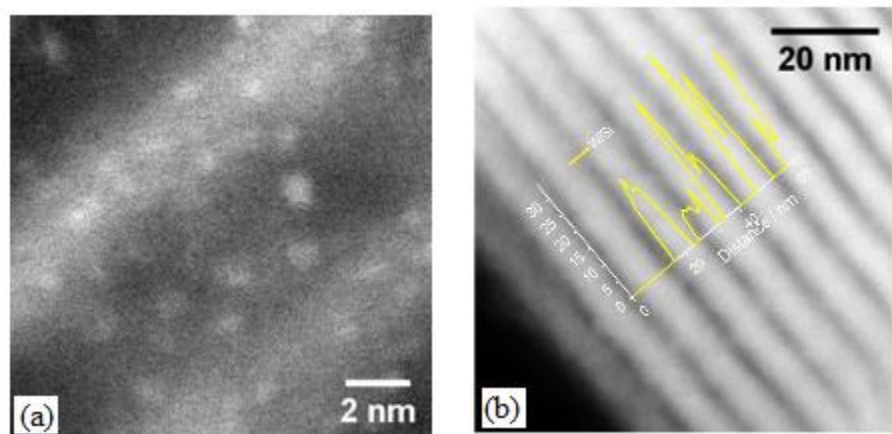

**Figure S3.** HRTEM dark-field images of 3.2 wt% HPW/SBA-15 (a) and 51.6 wt% HPW/SBA-15 (b). Inset shows the corresponding EDX profile.

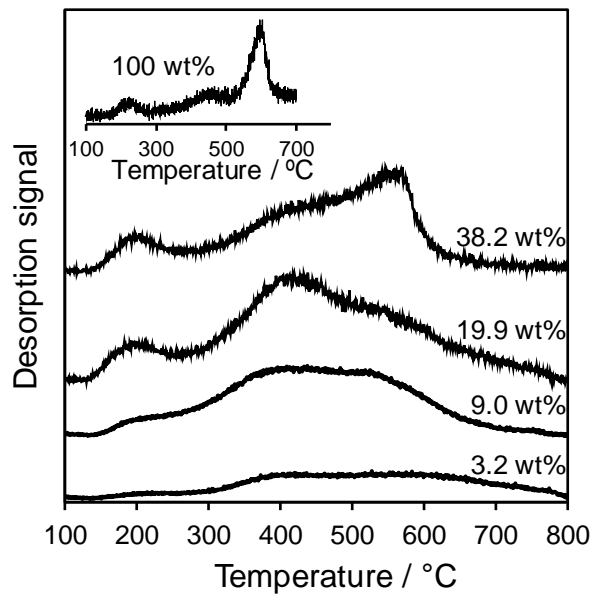

**Figure S4.**  $\text{NH}_3$  TPD spectra for HPW/SBA-15 as a function of W loading. Inset shows corresponding desorption spectrum for pure HPW.

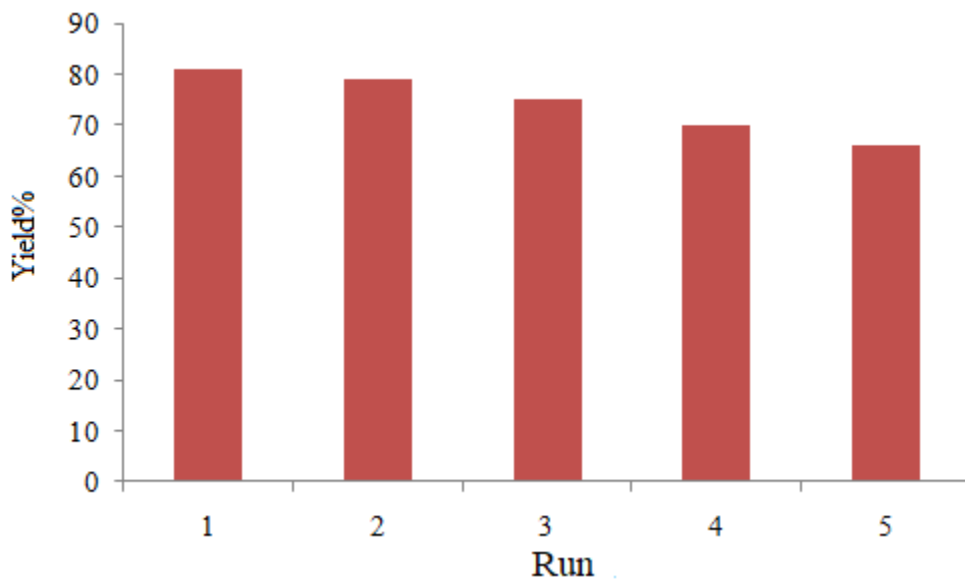

**Figure S5.** Indole yield over 51.8 wt% HPW/SBA-15 as a function of recycle. Reaction condition: benzaldehyde (1 mmol), malononitrile (1 mmol), and indole (1 mmol); 60 °C; 20 min; 5 mg catalyst.

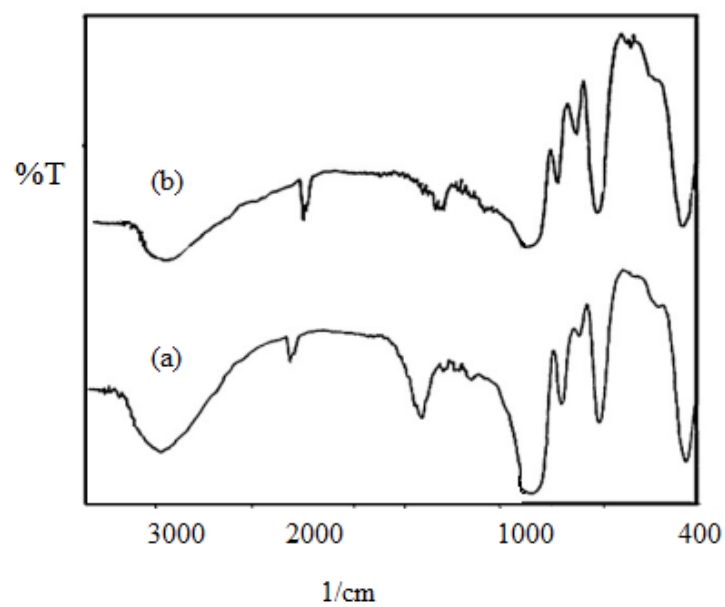

**Figure S6.** FT-IR spectra of 51.8 wt% HPW/SBA-15 (a) as-prepared, and (b) after 5 consecutive reactions.

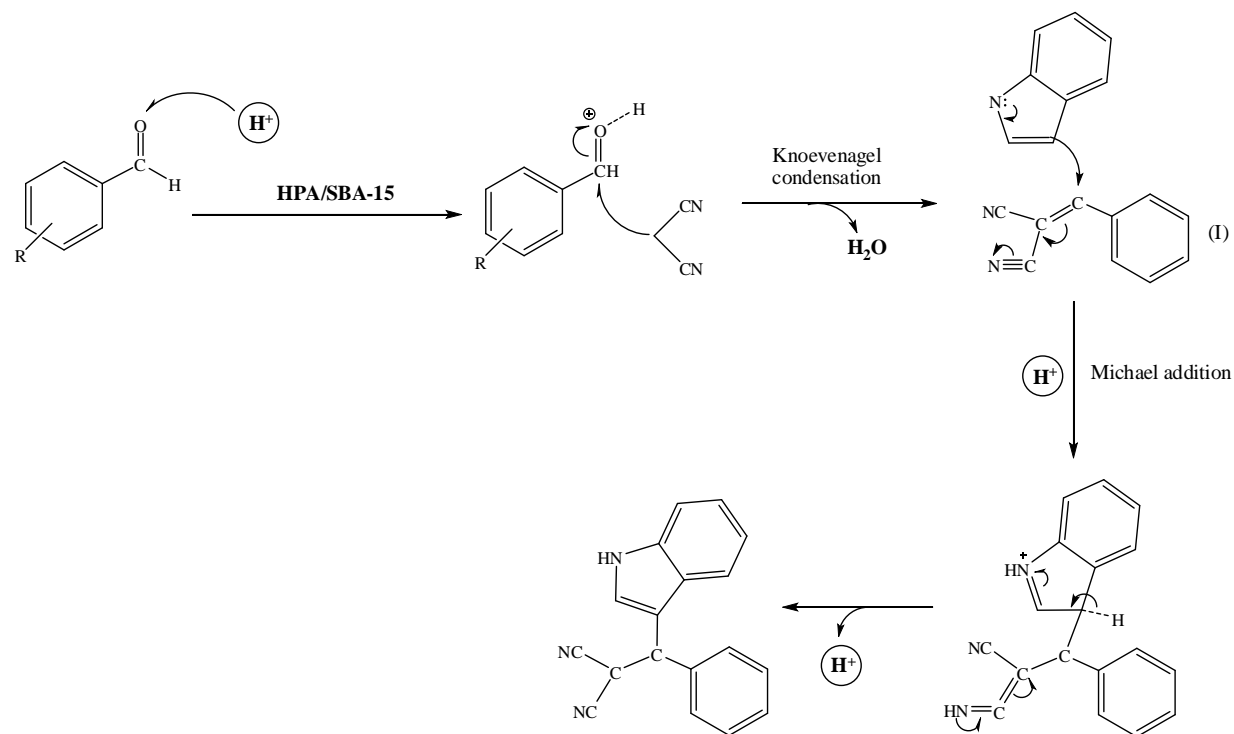

**Figure S7.** Proposed reaction pathway for the three-component condensation reaction.

**Reference:** Frattini, L.; Isaacs, M. A.; Parlett, C. M.; Wilson, K.; Kyriakou, G.; Lee, A. F. Support enhanced  $\alpha$ -pinene isomerization over HPW/SBA-15. *Appl. Catal. B: Environ.* **2017**, *200*, 10.
